# Supplementary material
Source: publisher figshare collection journal article supplement (https://gsapubs.figshare.com/ndownloader/files/26338204)
Supplement: Supplementary file 1 [file 26338204]

## Sheet: Table S3_bedr river erosivity
	river			given data											predicted values
	section number	river (site)	mountains/region, state	bed slope	water depth H [m]		lithology	tensile strength σt [MPa]			grainsizes D [m]				potential mean transportable grainsize (eq.9)	impact energy	normalized impact energy	abrasion volume (Fig. 3)	abrasion regime* (Fig. 2)	source
				S [-]	mean flow	flood flow		measured	assumed	info	D50	D84	D90	Dmax	D50 [m]	εkin [J]	εkin / σt2 [J/Pa2]	Va [m3]		(of S, H, σt and D)
	1	Katherine Gorge	Northern Territory, Australia	0.003	-	45	hard sandstone	-	7000000	†	-	-	-	3	2.331	278506	5.68379e-09	0.000218555	3	Baker and Pickup, 1987; Baker and Kale, 1998
	2	Narmada River (Pools)	Central India	0.0003	-	68	granite, gneiss	-	7000000	†	-	-	-	2	0.626	1265.81	2.5833e-11	9.93338e-07	3	Baker and Kale, 1998
	3	Narmada River (Rapids)	Central India	0.0008	-	57	granite, gneiss	-	7000000	†	-	-	-	2	1.096	12897.5	2.63214e-10	1.01212e-05	3	Baker and Kale, 1998
	4	Narmada River (Multi-Channel)	Central India	0.0012	-	13	granite, gneiss	-	7000000	†	-	-	-	2	0.339	100.115	2.04316e-12	7.85642e-08	1	Baker and Kale, 1998
	5	Narmada River (Rapids)	Central India	0.03	-	10	granite, gneiss	-	7000000	†	-	-	-	2	2.912	720345	1.47009e-08	0.000565285	3	Baker and Kale, 1998
	6	Tapi River (Gorge Head)	Central India	0.0016	-	17	granite, gneiss	-	7000000	†	-	-	-	2	0.549	758.597	1.54816e-11	5.95303e-07	2	Baker and Kale, 1998
	7	Tapi River (Wilde Gorge)	Central India	0.0013	-	15	granite, gneiss	-	7000000	†	-	-	-	2	0.415	234.023	4.77598e-12	1.83648e-07	1	Baker and Kale, 1998
	8	Indus	Himalaya, Pakistan	0.0073	-	10	schist	-	1.09413e+07	$	-	-	-	-	1.009	9668.31	8.07634e-11	3.10554e-06	3	Hancock et al., 1998
	9	Indus	Himalaya, Pakistan	0.012	-	10	granite	-	9.7984e+06	$	-	-	-	-	1.465	44497.5	4.63473e-10	1.78216e-05	3	Hancock et al., 1998
	10	Indus	Himalaya, Pakistan	0.0022	-	10	granite	-	1.188e+07	$	-	-	-	-	0.41	226.484	1.60475e-12	6.17064e-08	1	Hancock et al., 1998
	11	Indus	Himalaya, Pakistan	0.0074	-	10	granite	-	1.1174e+07	$	-	-	-	-	1.019	10083.3	8.07586e-11	3.10536e-06	3	Hancock et al., 1998
	12	Indus	Himalaya, Pakistan	0.0017	-	10	micaschist	-	8.90958e+06	$	-	-	-	-	0.338	100.49	1.26593e-12	4.8678e-08	1	Hancock et al., 1998
	13	Indus	Himalaya, Pakistan	0.02	-	10	gneiss	-	1.07099e+07	$	-	-	-	-	2.149	210673	1.83669e-09	7.06249e-05	3	Hancock et al., 1998
	14	Indus	Himalaya, Pakistan	0.0076	-	10	gneiss	-	9.7984e+06	$	-	-	-	-	1.04	10948.6	1.14038e-10	4.38503e-06	3	Hancock et al., 1998
	15	Indus	Himalaya, Pakistan	0.023	-	10	gneiss	-	1.07099e+07	$	-	-	-	-	2.386	321930	2.80664e-09	0.000107922	3	Hancock et al., 1998
	16	Indus	Himalaya, Pakistan	0.013	-	15	-	-	1.048e+07	$	-	-	-	-	2.333	289604	2.63684e-09	0.000101393	3	Hancock et al., 1998
	17	Upper Ukak	Aleutian Range, Alaska	0.216	-	3.5	sandstone	-	9.57403e+06	$	-	-	-	-	4.481	3.46556e+06	3.7808e-08	0.00145381	3	Whipple et al., 2000b
	18	Upper Ukak	Aleutian Range, Alaska	0.096	-	5.9	sandstone	-	9.57403e+06	$	-	-	-	-	4.111	2.96675e+06	3.23662e-08	0.00124456	3	Whipple et al., 2000b
	19	Upper Ukak	Aleutian Range, Alaska	0.158	-	6.9	sandstone	-	9.57403e+06	$	-	-	-	-	6.987	2.44796e+07	2.67064e-07	0.0102692	3	Whipple et al., 2000b
	20	Upper Ukak	Aleutian Range, Alaska	0.05	-	7.4	sandstone	-	9.57403e+06	$	-	-	-	-	3.161	1.01605e+06	1.10847e-08	0.000426233	3	Whipple et al., 2000b
	21	Upper Ukak	Aleutian Range, Alaska	0.131	-	8.3	sandstone	-	9.57403e+06	$	-	-	-	-	7.302	2.97996e+07	3.25103e-07	0.012501	3	Whipple et al., 2000b
	22	Upper Ukak	Aleutian Range, Alaska	0.021	-	3.7	weaker sandstone, siltstone	-	6.79373e+06	$	-	-	-	-	0.825	4352.29	9.42977e-11	3.62597e-06	3	Whipple et al., 2000b
	23	Upper Ukak	Aleutian Range, Alaska	0.009	-	7.3	sandstone	-	6.79373e+06	$	-	-	-	-	0.862	5095.9	1.10409e-10	4.24548e-06	3	Whipple et al., 2000b
	24	Bagmati River	Himalaya, Nepal	0.002	-	2.58	weak sandstone	-	2000000	†	0.07	-	0.6	-	0.099	0.651759	1.6294e-13	6.26542e-09	1	Lave and Avouac, 2001
	25	Bagmati River	Himalaya, Nepal	0.0035	-	2.3	weak sandstone	-	2000000	†	0.07	-	0.6	-	0.134	2.25849	5.64623e-13	2.17111e-08	1	Lave and Avouac, 2001
	26	Bagmati River	Himalaya, Nepal	0.002	-	7.86	weak sandstone	-	2000000	†	0.07	-	0.6	-	0.3	61.5259	1.53815e-11	5.91454e-07	1	Lave and Avouac, 2001
	27	Bagmati River	Himalaya, Nepal	0.0048	-	0.93	weak sandstone	-	2000000	†	0.07	-	0.6	-	0.069	0.157123	3.92807e-14	1.51044e-09	1	Lave and Avouac, 2001
	28	Bagmati River	Himalaya, Nepal	0.0009	-	16.05	weak sandstone	-	2000000	†	0.07	-	0.6	-	0.337	97.4011	2.43503e-11	9.36326e-07	1	Lave and Avouac, 2001
	29	Bagmati River	Himalaya, Nepal	0.0072	-	2.23	weak sandstone	-	2000000	†	0.07	-	0.6	-	0.223	18.5251	4.63127e-12	1.78083e-07	1	Lave and Avouac, 2001
	30	Bagmati River	Himalaya, Nepal	0.007	-	0.74	weak sandstone	-	2000000	†	0.07	-	0.6	-	0.072	0.197399	4.93498e-14	1.89762e-09	1	Lave and Avouac, 2001
	31	Bagmati River	Himalaya, Nepal	0.0002	-	23.31	weak sandstone	-	2000000	†	0.07	-	0.6	-	0.158	4.18806	1.04701e-12	4.02602e-08	1	Lave and Avouac, 2001
	32	Bakeya River	Himalaya, Nepal	0.0031	-	0.71	weak sandstone	-	2000000	†	0.07	-	0.6	-	0.038	0.0146204	3.65511e-15	1.40548e-10	1	Lave and Avouac, 2001
	33	Bakeya River	Himalaya, Nepal	0.0037	-	0.9	weak sandstone	-	2000000	†	0.07	-	0.6	-	0.055	0.0632085	1.58021e-14	6.07629e-10	1	Lave and Avouac, 2001
	34	Bakeya River	Himalaya, Nepal	0.0025	-	2.96	weak sandstone	-	2000000	†	0.07	-	0.6	-	0.134	2.23535	5.58837e-13	2.14886e-08	1	Lave and Avouac, 2001
	35	Bakeya River	Himalaya, Nepal	0.0054	-	3.37	weak sandstone	-	2000000	†	0.07	-	0.6	-	0.271	41.4511	1.03628e-11	3.98473e-07	1	Lave and Avouac, 2001
	36	Bakeya River	Himalaya, Nepal	0.0086	-	1.9	weak sandstone	-	2000000	†	0.07	-	0.6	-	0.217	16.6788	4.16971e-12	1.60335e-07	1	Lave and Avouac, 2001
	37	Bakeya River	Himalaya, Nepal	0.0053	-	2.84	weak sandstone	-	2000000	†	0.07	-	0.6	-	0.225	19.2803	4.82007e-12	1.85343e-07	1	Lave and Avouac, 2001
	38	Bakeya River	Himalaya, Nepal	0.0023	-	3.86	weak sandstone	-	2000000	†	0.07	-	0.6	-	0.164	5.08318	1.2708e-12	4.88651e-08	1	Lave and Avouac, 2001
	39	Bakeya River	Himalaya, Nepal	0.0036	-	2.12	weak sandstone	-	2000000	†	0.07	-	0.6	-	0.126	1.77126	4.42816e-13	1.70273e-08	1	Lave and Avouac, 2001
	40	Bakeya River	Himalaya, Nepal	0.0034	-	1.44	weak sandstone	-	2000000	†	0.07	-	0.6	-	0.082	0.316085	7.90212e-14	3.03855e-09	1	Lave and Avouac, 2001
	41	Bakeya River	Himalaya, Nepal	0.0071	-	0.58	weak sandstone	-	2000000	†	0.07	-	0.6	-	0.057	0.0784533	1.96133e-14	7.54178e-10	1	Lave and Avouac, 2001
	42	Liwu River	Taroko Gorge, Taiwan	0.02	-	15	densly foliated schist	5300000	-	-	-	-	-	3	0.057	1.06747e+06	3.80017e+06	0.00146126	3	Hartshorn et al., 2002
	43	Liwu River	Taroko Gorge, Taiwan	0.02	-	15	massive quarzite	9500000	-	-	-	-	-	3	3.223	1.06747e+06	1.18279e+06	0.000454811	3	Hartshorn et al., 2002
	44	Eel River	Coast Range, CA, USA	0.0053	1.1	-	sandstone	7000000	-	-	0.06	-	-	-	0.087	0.412994	8.42845e-15	3.24094e-10	1	Sklar and Dietrich, 2004
	45	Joekulsa River	Vatnajokull, Iceland	0.01	-	59	basalt	-	10000000	†	-	-	-	5	7.538	3.12688e+07	3.12688e-07	0.0120236	3	Alho et al., 2005
	46	West Fork, Satsop River	Olympic Mountains, WA, USA	0.023	1.1	-	micaceous fine siltstone	214000	-	-	0.04	-	-	-	0.262	37.8781	8.27105e-10	3.18042e-05	1	Stock et al., 2005
	47	Black Creek	Olympic Mountains, WA, USA	0.06	1	-	micaceous medium siltstone	267000	-	-	0.04	-	-	-	0.49	518.006	7.26628e-09	0.000279406	2	Stock et al., 2005
	48	Walker Creek 1	Cascades, OR, USA	0.08	0.2	-	indurated lahar	2150000	-	-	0.005	-	-	-	0.122	1.69319	3.66293e-13	1.40848e-08	1	Stock et al., 2005
	49	Walker Creek 2	Cascades, OR, USA	0.09	0.2	-	indurated lahar	2150000	-	-	0.005	-	-	-	0.133	2.42269	5.24108e-13	2.01532e-08	1	Stock et al., 2005
	50	Walker Creek 3	Cascades, OR, USA	0.08	0.2	-	indurated lahar	2150000	-	-	0.005	-	-	-	0.122	1.69319	3.66293e-13	1.40848e-08	1	Stock et al., 2005
	51	Sullivan Creek 1	Coast Range, OR, USA	0.13	0.4	-	micaceous medium siltstone	4330000	-	-	0.025	-	-	-	0.35	129.127	6.88716e-12	2.64828e-07	1	Stock et al., 2005
	52	Sullivan Creek 2	Coast Range, OR, USA	0.07	0.7	-	micaceous medium siltstone	4330000	-	-	0.025	-	-	-	0.385	190.723	1.01725e-11	3.91157e-07	1	Stock et al., 2005
	53	South Fork, Eel River	Coast Range, CA, USA	0.014	0.7	-	silstone	2680000	-	-	0.09	-	-	-	0.115	1.29114	1.79764e-13	6.91236e-09	1	Stock et al., 2005
	54	Tachia River	Western Foothills, Taiwan	0.013	4	-	siltstone, shale	280000	-	-	-	-	-	-	0.622	1342.25	1.71205e-08	0.000658323	3	Stock et al., 2005
	55	Tali River	Western Foothills, Taiwan	0.019	1.6	-	shale, siltstone	140000	-	-	0.089	-	-	-	0.331	98.2402	5.01225e-09	0.000192733	1	Stock et al., 2005
	56	Shichiri River	Boso Peninsula, Japan	0.009	1	-	weak sandstone, mudstone	-	-	NA	0.08	0.15	-	-	0.118	1.40833	-	-	1	Wohl and David, 2008
	57	Torii River 1	Boso Peninsula, Japan	0.02	0.8	-	weak sandstone, mudstone	-	-	NA	0.05	0.1	-	-	0.172	6.62976	-	-	1	Wohl and David, 2008
	58	Rio Puerco	Nacimiento Mountains, NM, USA	0.022	1.6	-	shale, siltstone, sandstone	-	-	NA	0.16	0.1	-	-	0.369	155.842	-	-	1	Wohl and David, 2008
	59	New River	Appalachian Mountains, WV, USA	0.002	6	-	shale, siltstone, sandstone	-	-	NA	-	-	-	-	0.229	20.1078	-	-	1	Wohl and David, 2008
	60	Anacostia River 2	Montgomery County, MD, USA	0.002	1.9	-	metamorphic	-	-	NA	0.12	0.3	-	-	0.073	0.192537	-	-	1	Wohl and David, 2008
	61	Twenty Mile Creek	Niagara Peninsula, ON, Canada	0.007	1.5	-	shale, limestone	-	-	NA	-	-	-	-	0.147	3.35658	-	-	1	Wohl and David, 2008
	62	Swayze Creek	Niagara Peninsula, ON, Canada	0.025	0.8	-	shale, limestone	-	-	NA	-	-	-	-	0.203	13.24	-	-	1	Wohl and David, 2008
	63	Deep Run Creek	Howard County, MD, USA	0.007	1	-	gabbro	-	-	NA	0.06	0.2	-	-	0.098	0.655446	-	-	1	Wohl and David, 2008
	64	Nahal Paran 2	Negev Desert, Israel	0.018	5.1	-	dolomite, chert	-	-	NA	0.37	0.88	-	-	1.013	10048.9	-	-	3	Wohl and David, 2008
	65	Piccaninny Creek 3	Bungle Bungle Range, Australia	0.003	1.4	-	sandstone, conglomerate	-	-	NA	0.11	0.25	-	-	0.073	0.193826	-	-	1	Wohl and David, 2008
	66	Piccaninny Creek 2	Bungle Bungle Range, Australia	0.004	1.1	-	sandstone, conglomerate	-	-	NA	0.11	0.22	-	-	0.071	0.176775	-	-	1	Wohl and David, 2008
	67	Piccaninny Creek 1	Bungle Bungle Range, Australia	0.004	3.5	-	sandstone, conglomerate	-	-	NA	0.11	0.26	-	-	0.225	18.9521	-	-	1	Wohl and David, 2008
	68	Nahal Paran 1	Negev Desert, Israel	0.008	7.7	-	dolomite, chert	-	-	NA	0.15	0.56	-	-	0.832	4399.7	-	-	3	Wohl and David, 2008
	69	Futama River 2	Boso Peninsula, Japan	0.094	2.4	-	mudstone	-	-	NA	0.03	0.1	-	-	1.646	75400.3	-	-	3	Wohl and David, 2008
	70	Muddy River	Mount St. Helens, WA, USA	0.036	5.3	-	vulcanoclastics	-	-	NA	-	-	-	-	1.77	98318.4	-	-	3	Wohl and David, 2008
	71	Cheat River	Alleghney Mountains, WV, USA	0.007	5.6	-	limestone	-	-	NA	0.4	0.65	-	-	0.548	776.068	-	-	2	Wohl and David, 2008
	72	Wire Pass	Colorado Plateau, UT, USA	0.043	2.2	-	sandstone	-	-	NA	0.16	0.28	-	-	0.839	4771.29	-	-	3	Wohl and David, 2008
	73	Upper Forty Mile Creek	Colorado Plateau, UT, USA	0.021	8	-	sandstone	-	-	NA	0.005	0.1	-	-	1.783	99758.7	-	-	3	Wohl and David, 2008
	74	Lower Forty Mile Creek 2	Colorado Plateau, UT, USA	0.026	12.7	-	sandstone	-	-	NA	0.003	0.1	-	-	3.322	1.21439e+06	-	-	3	Wohl and David, 2008
	75	Coyote Wash	Paunsaugunt Plateau, UT, USA	0.026	1.8	-	sandstone	-	-	NA	0.23	0.49	-	-	0.471	430.458	-	-	2	Wohl and David, 2008
	76	Buckskin Gulch 1	Paria Plateau, UT, USA	0.008	13	-	sandstone	-	-	NA	0.18	0.5	-	-	1.405	37200.1	-	-	3	Wohl and David, 2008
	77	Buckskin Gulch 1	Paria Plateau, UT, USA	0.021	8.5	-	sandstone	-	-	NA	0.16	0.42	-	-	1.895	127280	-	-	3	Wohl and David, 2008
	78	Pawnee Creek 1	Rocky Mountains, CO, USA	0.019	0.8	-	claystones, mudstones, siltstones	-	-	NA	0.001	0.1	-	-	0.165	5.65813	-	-	1	Wohl and David, 2008
	79	Pawnee Creek 2	Rocky Mountains, CO, USA	0.098	0.9	-	claystones, mudstones, siltstones	-	-	NA	0.002	0.1	-	-	0.637	1552.89	-	-	3	Wohl and David, 2008
	80	Lower Forty Mile Creek 1	Colorado Plateau, UT, USA	0.018	14	-	sandstone	-	-	NA	0.003	0.1	-	-	2.78	588849	-	-	3	Wohl and David, 2008
	81	Torii River 2	Boso Peninsula, Japan	0.02	0.9	-	weak sandstone, mudstone	-	-	NA	0.03	0.1	-	-	0.193	10.7283	-	-	1	Wohl and David, 2008
	82	Futama River 1	Boso Peninsula, Japan	0.103	2.8	-	mudstone	-	-	NA	0.05	0.15	-	-	2.057	185319	-	-	3	Wohl and David, 2008
	83	Big Box Creek	Colorado Plateau, AZ, USA	0.107	1.4	-	quarzite	-	-	NA	0.08	0.25	-	-	1.058	12569.5	-	-	3	Wohl and David, 2008
	84	Little Box Creek	Colorado Plateau, AZ, USA	0.139	0.9	-	quarzite	-	-	NA	0.11	0.28	-	-	0.828	4596.83	-	-	3	Wohl and David, 2008
	85	Swamp Run	Charles County, MD, USA	0.161	1.1	-	-	-	-	NA	0.04	0.25	-	-	1.13	15929.3	-	-	3	Wohl and David, 2008
	86	Difficult Run	Fairfax County, VA, USA	0.025	4	-	gneiss, schist	-	-	NA	0.04	0.28	-	-	1.016	10284.2	-	-	3	Wohl and David, 2008
	87	Forsythe Creek	Rocky Mountains, CO, USA	0.199	1.1	-	greywacke, sandstone, mudstone	-	-	NA	0.24	0.41	-	-	1.324	27079	-	-	3	Wohl and David, 2008
	88	North Fork, Poudre River	Rocky Mountains, CO, USA	0.011	4.1	-	granite, gneiss	-	-	NA	0.19	0.37	-	-	0.563	880.09	-	-	3	Wohl and David, 2008
	89	Anacostia River 1	Montgomery County, MD, USA	0.009	1.4	-	-	-	-	NA	0.13	0.55	-	-	0.165	5.50123	-	-	1	Wohl and David, 2008
	90	Greenbrier River 1	Appalachian Mountains, WV, USA	0.002	5.5	-	limestone	-	-	NA	0.25	0.58	-	-	0.21	14.0507	-	-	1	Wohl and David, 2008
	91	Greenbrier River 2	Appalachian Mountains, WV, USA	0.001	10.5	-	limestone	-	-	NA	0.1	0.32	-	-	0.239	23.2791	-	-	1	Wohl and David, 2008
	92	Saint Charles River	Wet Mountains, CO, USA	0.012	2.7	-	granite	-	-	NA	0.1	0.21	-	-	0.396	203.597	-	-	1	Wohl and David, 2008
	93	Buckhorn Creek	Rocky Mountains, CO, USA	0.01	1	-	amphibolite	-	-	NA	0.14	0.24	-	-	0.128	1.94346	-	-	1	Wohl and David, 2008
	94	North Saint Vrain Creek	Rocky Mountains, CO, USA	0.014	0.8	-	sandstone	-	-	NA	0.15	0.55	-	-	0.132	2.21176	-	-	1	Wohl and David, 2008
	95	South Saint Vrain Creek	Rocky Mountains, CO, USA	0.008	1	-	sandstone	-	-	NA	0.15	0.48	-	-	0.108	0.983504	-	-	1	Wohl and David, 2008
	96	Rio Chagrecito	Chagres National Park, Panama	0.034	1.7	-	intrisive volcanic, volcanoclastics	-	-	NA	0.11	0.32	-	-	0.544	789.07	-	-	2	Wohl and David, 2008
	97	Rio Chagres 1	Chagres National Park, Panama	0.034	2.2	-	intrisive volcanic, volcanoclastics	-	-	NA	0.3	0.4	-	-	0.704	2295.47	-	-	3	Wohl and David, 2008
	98	Rio Chagres 2	Chagres National Park, Panama	0.024	2	-	intrisive volcanic, volcanoclastics	-	-	NA	0.24	0.38	-	-	0.493	518.555	-	-	2	Wohl and David, 2008
	99	Rio Chagres 3	Chagres National Park, Panama	0.017	2	-	intrisive volcanic, volcanoclastics	-	-	NA	0.19	0.24	-	-	0.38	175.02	-	-	1	Wohl and David, 2008
	100	Pondicherry 1	Puducherry, India	0.022	0.9	-	conglomerate sandstone	-	-	NA	0.1	0.2	-	-	0.208	14.426	-	-	1	Wohl and David, 2008
	101	Pondicherry 2	Puducherry, India	0.144	1.4	-	conglomerate sandstone	-	-	NA	0.1	0.2	-	-	1.322	31261.1	-	-	3	Wohl and David, 2008
	102	Erlenbach Creek	Pre-Alps, Schwyz, Switzerland	0.16	-	1.25	Flysch	-	2000000	†	0.08	-	-	0.63	1.278	26399.2	6.5998e-09	0.000253778	3	Turowski et al., 2009, 2011
	103	Daan River	Central Range, Taiwan	0.014	-	1.60915	mudstone, siltstone	-	2.00833e+06	$	0.01	-	0.04	0.1	0.265	38.5514	9.55804e-12	3.67529e-07	1	Cook et al., 2013
	104	Daan River	Central Range, Taiwan	0.001	-	3.95515	mudstone, siltstone	-	2.00833e+06	$	1.01	-	0.04	0.1	0.09	0.441794	1.09534e-13	4.21184e-09	1	Cook et al., 2013
	105	Daan River	Central Range, Taiwan	0.0012	-	16.7346	mudstone, siltstone	-	2.00833e+06	$	2.01	-	0.04	0.1	0.436	287.076	7.11746e-11	2.73683e-06	2	Cook et al., 2013
	106	Daan River	Central Range, Taiwan	0.038	-	1.17227	mudstone, siltstone	-	2.00833e+06	$	3.01	-	0.04	0.1	0.408	238.771	5.91985e-11	2.27632e-06	1	Cook et al., 2013
	107	Daan River	Central Range, Taiwan	0.25	-	1.01121	mudstone, siltstone	-	2.00833e+06	$	4.01	-	0.04	0.1	1.445	34084.3	8.45052e-09	0.000324943	3	Cook et al., 2013
	108	Daan River	Central Range, Taiwan	0.0077	-	1.50919	mudstone, siltstone	-	2.00833e+06	$	5.01	-	0.04	0.1	0.159	4.61479	1.14414e-12	4.3995e-08	1	Cook et al., 2013
	109	Daan River	Central Range, Taiwan	0.25	-	50.1529	mudstone, siltstone	-	2.00833e+06	$	6.01	-	0.04	0.1	71.643	2.09371e+11	0.0519092	1996.03	3	Cook et al., 2013
	110	Daan River	Central Range, Taiwan	0.025	-	3.95923	mudstone, siltstone	-	2.00833e+06	$	7.01	-	0.04	0.1	1.006	9862.81	2.44528e-09	9.4027e-05	3	Cook et al., 2013
	111	Daan River	Central Range, Taiwan	0.005	-	5.44343	mudstone, siltstone	-	2.00833e+06	$	8.01	-	0.04	0.1	0.414	238.91	5.92329e-11	2.27765e-06	1	Cook et al., 2013
	112	Elder Creek	Coast Range, CA, USA	0.37	0.13	-	arkosic sandstone, argilite	-	7000000	†	0.057	0.133	-	-	0.249	22.3072	4.55248e-13	1.75054e-08	1	Scheingross et al., 2013
	113	Elder Creek	Coast Range, CA, USA	0.18	0.15	-	arkosic sandstone, argilite	-	7000000	†	0.097	0.273	-	-	0.167	5.85877	1.19567e-13	4.59763e-09	1	Scheingross et al., 2013
	114	Elder Creek	Coast Range, CA, USA	0.07	0.15	-	arkosic sandstone, argilite	-	7000000	†	0.101	0.286	-	-	0.082	0.357257	7.29095e-15	2.80354e-10	1	Scheingross et al., 2013
	115	Elder Creek	Coast Range, CA, USA	0.09	0.3	-	arkosic sandstone, argilite	-	7000000	†	0.155	0.446	-	-	0.199	12.5984	2.57109e-13	9.88646e-09	1	Scheingross et al., 2013
	116	Missery Creek	Coast Range, CA, USA	0.05	0.28	-	arkosic sandstone, argilite	-	7000000	†	0.072	0.201	-	-	0.12	1.56991	3.2039e-14	1.23197e-09	1	Scheingross et al., 2013
	117	Malad River	Sawtooth Range, ID, USA	0.0043	-	9	columnar basalt	-	10000000	†	0.58	-	-	4	0.611	1204.55	1.20455e-11	4.63178e-07	3	Lamb et al., 2014
	118	Riedbach	Alps, Valais, Switzerland	0.02	0.26	-	chrystalline rocks	-	7000000	†	0.09	-	-	0.24	0.056	0.0733838	1.49763e-15	5.75874e-11	1	Schneider et al., 2015
	119	Riedbach	Alps, Valais, Switzerland	0.05	0.28	-	chrystalline rocks	-	7000000	†	0.15	-	-	0.29	0.12	1.56991	3.2039e-14	1.23197e-09	1	Schneider et al., 2015
	120	Riedbach	Alps, Valais, Switzerland	0.11	0.28	-	chrystalline rocks	-	7000000	†	0.18	-	-	65	0.216	17.6336	3.59868e-13	1.38378e-08	1	Schneider et al., 2015
	121	Riedbach	Alps, Valais, Switzerland	0.32	0.34	-	chrystalline rocks	-	7000000	†	0.34	-	-	1.66	0.584	765.152	1.56153e-11	6.00447e-07	2	Schneider et al., 2015
	122	Riedbach	Alps, Valais, Switzerland	0.38	0.29	-	chrystalline rocks	-	7000000	†	0.39	-	-	1.17	0.567	625.713	1.27697e-11	4.91023e-07	2	Schneider et al., 2015
	123	Riedbach	Alps, Valais, Switzerland	0.41	0.29	-	chrystalline rocks	-	7000000	†	0.36	-	-	1.14	0.6	762.195	1.5555e-11	5.98126e-07	2	Schneider et al., 2015
	124	Riedbach	Alps, Valais, Switzerland	0.38	0.39	-	chrystalline rocks	-	7000000	†	-	-	-	-	0.763	2085.56	4.25625e-11	1.63663e-06	3	Schneider et al., 2015
	125	Moses Coulee	Watrville Plateau, WA, USA	0.0174551	-	76	columnar basalt	-	10000000	†	0.14	-	1	4	14.746	4.64676e+08	4.64676e-06	0.178679	3	Larson and 2016
	126	Gornera River	Alps, Valais, Switzerland	0.007	3	-	serpentinite	2300000	-	-	0.04	0.09	0.1	2	0.293	57.8076	1.09277e-11	4.20197e-07	1	Beer et al., 2017
	† assumed tensile strength, based on reported rock type and on tensile strength measurements for various rock given in Sklar and Dietrich, 2001, Figure 2
	$ tensile strength converted from Schmidt Hammer measurements (eq. 11)
	NA tensile strength values not available
	* abrasion regime types: 1=wear, 2=transition, 3=macro-abrasion

## Sheet: G48466
Beer, A.R., and Lamb, M.P.,2021, Abrasion regimes in fluvial bedrock incision: Geology, v. 49, https://doi.org/10.1130/G48466.1
